# Supplementary material for: Critical evaluation of spectral information of benchtop vs. portable near-infrared spectrometers: quantum chemistry and two-dimensional correlation spectroscopy for a better understanding of PLS regression models of the rosmarinic acid content in Rosmarini folium
Source: Royal Society of Chemistry journal article supplement (doi:10.1039/c6an02439d), 2016-12-15
Supplement: c6an02439d1.pdf [file c6an02439d1.pdf]

## Electronic Supplementary Information

### Critical evaluation of spectral information of benchtop vs. portable near-infrared spectrometers: Quantum chemistry and two-dimensional correlation spectroscopy for a better understanding of PLS regression models of the rosmarinic acid content in *Rosmarini folium*

Christian G. Kirchler<sup>1</sup>, Cornelia K. Pezzei<sup>1</sup>, Krzysztof B. Beć<sup>1</sup>, Sophia Mayr<sup>1</sup>, Mika Ishigaki<sup>2</sup>, Yukihiro Ozaki<sup>2</sup>, Christian W. Huck<sup>1\*</sup>

<sup>1</sup> Institute of Analytical Chemistry and Radiochemistry, CCB-Center for Chemistry and Biomedicine, Innrain 80/82, 6020 Innsbruck, Austria

<sup>2</sup> Department of Chemistry, School of Science and Technology, Kwansai Gakuin University, Sanda, Hyogo 669-1337, Japan

\*address correspondence to:

Univ.-Prof.Mag.Dr. Christian Huck  
Head of Spectroscopy Unit  
Institute of Analytical Chemistry and Radiochemistry  
CCB-Center for Chemistry and Biomedicine  
Innrain 80/82  
6020 Innsbruck  
Austria  
Mail: [Christian.W.Huck@uibk.ac.at](mailto:Christian.W.Huck@uibk.ac.at)  
Phone: +43 512 507 57304

#### Table of contents:

|                                                                                                                                                                               |    |
|-------------------------------------------------------------------------------------------------------------------------------------------------------------------------------|----|
| Table S-1: NIR spectra recording parameters .....                                                                                                                             | S2 |
| Table S-2: Instrument specification NIRFlex N-500 .....                                                                                                                       | S2 |
| Table S-3: Instrument specification microPHAZIR .....                                                                                                                         | S3 |
| Table S-4: Instrument specification MicroNIR 2200 .....                                                                                                                       | S3 |
| Table S-5: DFT-B3LYP/N07D optimized structural parameters of RA molecule in Cartesian coordinates .....                                                                       | S4 |
| Fig. S-1: Contributions of first overtones, second overtones (estimated) and binary combination modes into NIR spectrum of RA .....                                           | S5 |
| Fig. S-2: The contributions into the theoretical (DFT-B3LYP/N07D) NIR spectrum of rosmarinic acid stemming from each calculated band and the final theoretical spectrum ..... | S5 |

Table S-1: NIR spectra recording parameters

| spectrometer                            | NIRFlex N-500 | microPHAZIR | MicroNIR 2200            |
|-----------------------------------------|---------------|-------------|--------------------------|
| wavenumber range / $\text{cm}^{-1}$     | 10000 - 4000  | 6266 - 4173 | 8864 - 4626              |
| recording-resolution / $\text{cm}^{-1}$ | 8             | 21          | 33                       |
| spectra per sample                      | 3             | 6           | 6                        |
| scans per spectrum                      | 64            | 10          | 200 x 6500 $\mu\text{s}$ |
| data points per spectrum                | 1501          | 100         | 128                      |

Table S-2: Instrument specification NIRFlex N-500

|                              |                                                                                                                    |
|------------------------------|--------------------------------------------------------------------------------------------------------------------|
| <b>Spectrometer</b>          | <b>NIRFlex N-500 FT-NIR spectrometer</b>                                                                           |
| <b>Spectral range</b>        | 12500 - 4000 $\text{cm}^{-1}$ (standard 10000 - 4000 $\text{cm}^{-1}$ )<br>800 - 2500 nm (standard 1000 - 2500 nm) |
| <b>Resolution</b>            | 8 $\text{cm}^{-1}$ (with boxcar apodization)                                                                       |
| <b>Radiation source</b>      | Tungsten halogen lamp                                                                                              |
| <b>Monochromator</b>         | FT-NIR-Polarization interferometer with $\text{TeO}_2$ wedges                                                      |
| <b>Detector</b>              | Extended range InGaAs (temperature controlled)                                                                     |
| <b>Accessory</b>             | NIRFlex Solids Cell with rotating Add-on XL                                                                        |
| <b>Measuring mode</b>        | Diffuse reflection                                                                                                 |
| <b>Dimension</b>             | 350 x 250 x 450 mm (W x D x H) (Base Unit)                                                                         |
| <b>Operating temperature</b> | 5 to 35 °C                                                                                                         |

Table S-3: Instrument specification microPHAZIR

|                              |                                               |
|------------------------------|-----------------------------------------------|
| <b>Spectrometer</b>          | <b>ThermoScientific microPHAZIR</b>           |
| <b>Spectral range</b>        | 6266 - 4173 cm <sup>-1</sup> ; 1596 - 2396 nm |
| <b>Resolution (averaged)</b> | 21 cm <sup>-1</sup> ; 8 nm                    |
| <b>Radiation source</b>      | Tungsten halogen lamp                         |
| <b>Monochromator</b>         | MEMS-technology                               |
| <b>Detector</b>              | InGaAs                                        |
| <b>Measuring mode</b>        | Diffuse reflection                            |
| <b>Weight</b>                | 1,8 kg                                        |
| <b>Dimensions</b>            | 25,4 cm × 29,2 cm × 15,2 cm                   |
| <b>Power requirement</b>     | Lithium Ion rechargeable battery              |
| <b>Operating temperature</b> | 5°C to 40°C                                   |

Table S-4: Instrument specification MicroNIR 2200

|                                          |                                               |
|------------------------------------------|-----------------------------------------------|
| <b>Spectrometer</b>                      | <b>MicroNIR 2200 spectrometer</b>             |
| <b>Spectral range</b>                    | 8864 - 4626 cm <sup>-1</sup> ; 1128 - 2162 nm |
| <b>Geometric resolution</b>              | 33 cm <sup>-1</sup> (averaged); 8 nm          |
| <b>Optical resolution</b>                | <1.25% of center wavelength                   |
| <b>Radiation source</b>                  | Two integrated vacuum tungsten lamps          |
| <b>Monochromator</b>                     | Linear Variable Filter (LVF)                  |
| <b>Detector</b>                          | 128 pixel InGaAs photodiode array             |
| <b>Measuring mode</b>                    | Diffuse reflection                            |
| <b>Weight</b>                            | 60 g                                          |
| <b>Dimensions</b>                        | 45 mm diameter x 42 mm height                 |
| <b>Power requirement</b>                 | USB, <500mA at 5V                             |
| <b>Operating temperature</b>             | -20°C to 40°C                                 |
| <b>additional temperature controller</b> | thermoelectric cooling (TEC) appliance        |

Table S-5: DFT-B3LYP/N07D optimized structural parameters of RA molecule in Cartesian coordinates

|   | x / Å        | y / Å        | z / Å       |
|---|--------------|--------------|-------------|
| C | 9.136913964  | 1.993409388  | 2.319143744 |
| C | 10.49089596  | 1.670381388  | 2.426721744 |
| C | 10.86730596  | 0.386307388  | 2.809316744 |
| C | 9.885627964  | -0.586724612 | 3.087929744 |
| C | 8.541710964  | -0.258884612 | 2.979539744 |
| C | 8.141796964  | 1.037712388  | 2.593130744 |
| H | 8.848483964  | 2.997690388  | 2.020778744 |
| H | 11.25364196  | 2.417050388  | 2.213311744 |
| H | 7.813042964  | -1.031969612 | 3.202817744 |
| C | 4.301342964  | 1.248451388  | 2.509665744 |
| O | 4.032789964  | 2.383325388  | 2.167985744 |
| O | 3.373747293  | 0.419562917  | 2.627054298 |
| C | 1.125591964  | -0.519891612 | 2.810280744 |
| H | 1.506988964  | -1.252443612 | 2.089868744 |
| H | 1.320827964  | -0.918467612 | 3.811577744 |
| C | -0.358585036 | -0.305826612 | 2.601732744 |
| C | -1.218479036 | -0.167991612 | 3.700787744 |
| C | -0.897227036 | -0.231975612 | 1.310465744 |
| H | -0.251502036 | -0.345736612 | 0.442884744 |
| C | -2.583695036 | 0.047075388  | 3.519635744 |
| C | -2.265566036 | -0.016241612 | 1.119642744 |
| H | -2.677889036 | 0.037585388  | 0.113321744 |
| C | -3.107363036 | 0.124985388  | 2.219101744 |
| H | -0.839008036 | -0.226232612 | 4.718048744 |
| O | -3.395102036 | 0.176224388  | 4.607601744 |
| H | -4.301741036 | 0.313967388  | 4.299478744 |
| O | -4.465777036 | 0.335776388  | 2.139311744 |
| H | -4.744111036 | 0.381497388  | 1.217730744 |
| C | 1.652042964  | 1.805356388  | 3.693142744 |
| O | 2.053499964  | 1.786484388  | 4.831138744 |
| O | 0.802487964  | 2.734155388  | 3.213704744 |
| H | 0.596430964  | 3.336961388  | 3.946933744 |
| O | 10.24514996  | -1.845608612 | 3.462237744 |
| H | 11.21071096  | -1.898075612 | 3.489665744 |
| O | 12.16506796  | -0.035091612 | 2.945037744 |
| H | 12.77712996  | 0.682649388  | 2.744883744 |
| C | 1.982645964  | 0.749654388  | 2.633327744 |
| H | 1.839938964  | 1.192748388  | 1.643356744 |
| C | 6.740675964  | 1.431645388  | 2.465712744 |
| H | 6.564348964  | 2.461688388  | 2.155684744 |
| C | 5.645650964  | 0.676273388  | 2.687565744 |
| H | 5.692832964  | -0.360654612 | 3.005558744 |

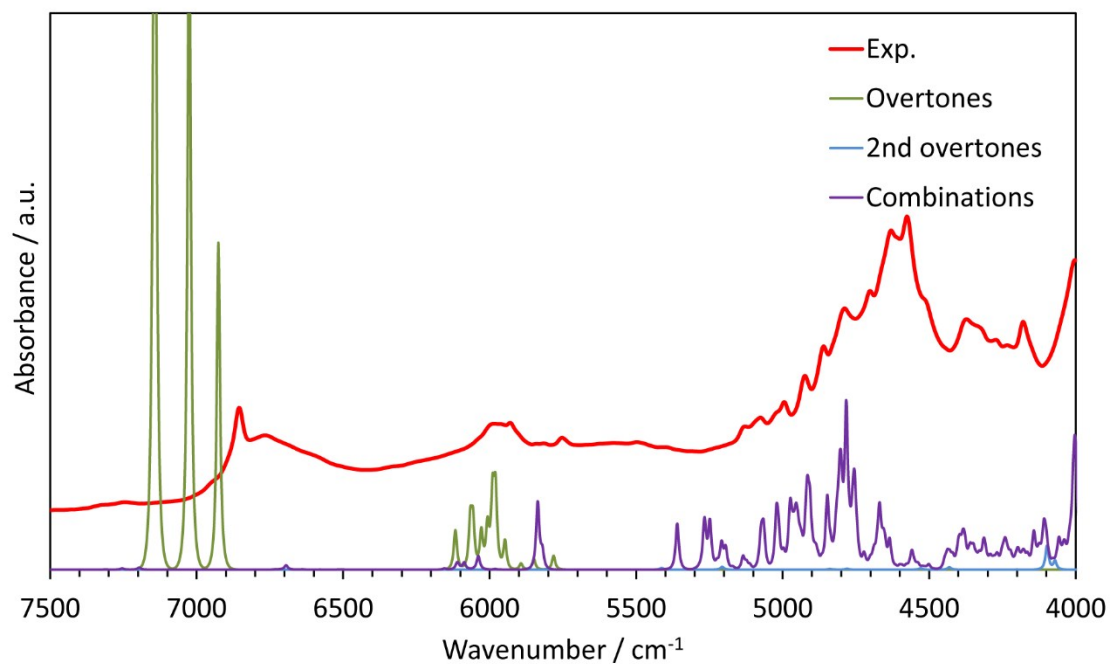

Fig. S-1: Contributions of first overtones, second overtones (estimated) and binary combination modes into NIR spectrum of RA. Plot based on unscaled DFT-B3LYP/N07D results. A lower FWHH parameter of modeled bands was applied here for better view of details.

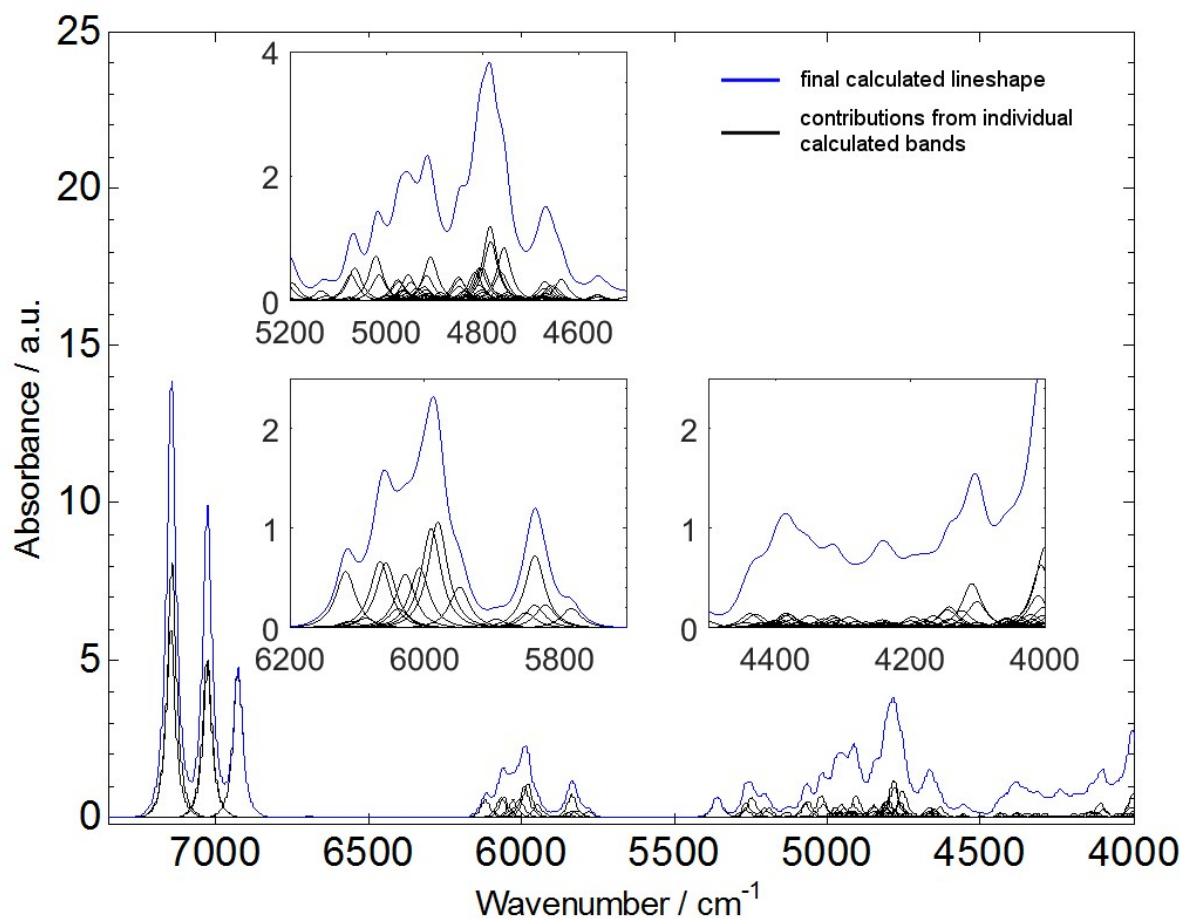

Fig. S-2: The contributions into the theoretical (DFT-B3LYP/N07D) NIR spectrum of rosmarinic acid stemming from each calculated band and the final theoretical spectrum. Raw unscaled theoretical data is presented here.
